# Supplementary material for: AaTs-1: A Tetrapeptide from Androctonus australis Scorpion Venom, Inhibiting U87 Glioblastoma Cells Proliferation by p53 and FPRL-1 Up-Regulations
Source: MDPI journal article supplement (doi:10.3390/molecules26247610), 2021-12-15
Supplement: s1 [file s1]

# AaTs-1: a Tetrapeptide from *Androctonus australis* Scorpion Venom, Inhibiting U87 Glioblastoma Cells Proliferation by p53 and FPRL-1 Up-Regulations

Dorra Aissaoui-Zid <sup>1,\*</sup>, Mohamed-Chiheb Saada <sup>1</sup>, Wassim Moslah <sup>1</sup>, Marie Potier-Cartereau <sup>2</sup>, Aude Lemettre <sup>2</sup>, Houcemeddine Othman <sup>1,3</sup>, Marc Gaysinski <sup>4</sup>, Zaineb Abdelkafi-Koubaa <sup>1</sup>, Soumaya Souid <sup>5,6</sup>, Naziha Marrakchi <sup>1</sup>, Christophe Vandier <sup>2</sup>, Khadija Essafi-Benkhadir <sup>5</sup> and Najet Srairi-Abid <sup>1,\*</sup>.

<sup>1</sup> Université de Tunis El Manar, Institut Pasteur de Tunis, LR20IPT01 biomolécules, venins et application thérapeutique, 1002, Tunis, Tunisie.

<sup>2</sup> Université de Tours, INSERM, N2C UMR 1069, Tours, France.

<sup>3</sup> Sydney Brenner Institute for Molecular Bioscience, Faculty of Health Sciences, University of the Witwatersrand, Johannesburg, South Africa.

<sup>4</sup> Université Nice Sophia Antipolis, Plate-Forme Technologique de Chimie Service RMN, Faculté des Sciences, Parc Valrose, 06108 Nice, France.

<sup>5</sup> Université de Tunis El Manar, Institut Pasteur de Tunis, LR16IPT04 Epidémiologie Moléculaire et Pathologie Expérimentale appliquée aux Maladies Infectieuses, 1002, Tunis, Tunisie.

<sup>6</sup> School of Basic Pharmaceutical and Toxicological Sciences, College of Pharmacy, University of Louisiana at Monroe, 1800 Bienville Drive, Monroe, LA, 71201, USA.

\* Correspondence: Aissaoui-Zid, Najet Srairi-Abid; Address: Institut Pasteur de Tunis, 13 Place Pasteur Tunis, 1002, Tunis Belvédère Tunisia; Tel : + 216 71 844 688 (ext. 409); fax : +216 71 791 833; e-mail : aissaoui.dorra@yahoo.com; najet.abid@pasteur.rns.tn

**Table S1.** Effect of H9 on mice viability/Lethality test.

| Group              | 1                                  | 2             | 3   | 4   | 5   | 6   | 7   |
|--------------------|------------------------------------|---------------|-----|-----|-----|-----|-----|
| Mice number        | 3                                  | 6             | 6   | 6   | 6   | 6   | 6   |
| Administration     | Intracerebro-ventricular injection |               |     |     |     |     |     |
| Solution/injection | 0.1% BSA                           |               |     |     |     |     |     |
| n                  | in water                           |               |     |     |     |     |     |
|                    | (vehicle)                          | H9 in vehicle |     |     |     |     |     |
| Volume/injection   |                                    |               |     |     |     |     | 5   |
| n                  |                                    |               |     |     |     |     | μL  |
| Dose (μg)          | 0                                  | 1             | 1.5 | 2   | 2.5 | 3   | 3.5 |
| Mortality          | 0/3                                | 0/6           | 0/6 | 0/6 | 0/6 | 0/6 | 0/6 |

Figure S1

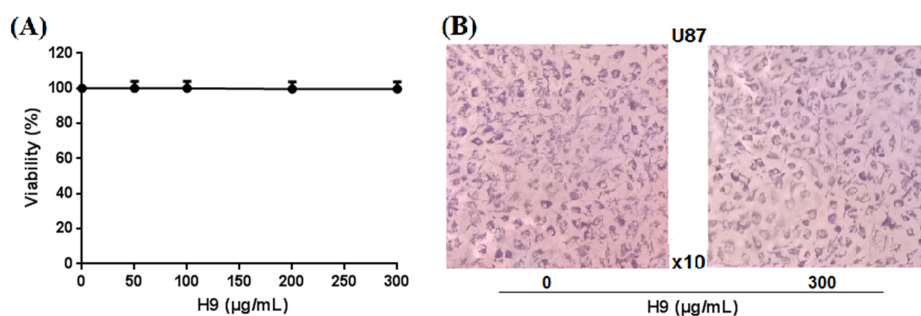

**Figure S1. Effect of H9 on U87 cell viability (A). Microscopic observation of U87 cells after treatment with MTT (B).** Cells were incubated with different concentrations of the tested molecule. After 24 h, cells were treated with MTT (0.5 mg/mL). The crystals formed after the reduction of MTT by mitochondrial dehydrogenases were dissolved with DMSO. The quantification of live cells was achieved by measuring absorbance at 560 nm. A negative control was used in the same condition with mock-treated cells. Cells treated with 0.1% Triton X-100 were used as positive control.

Figure S2

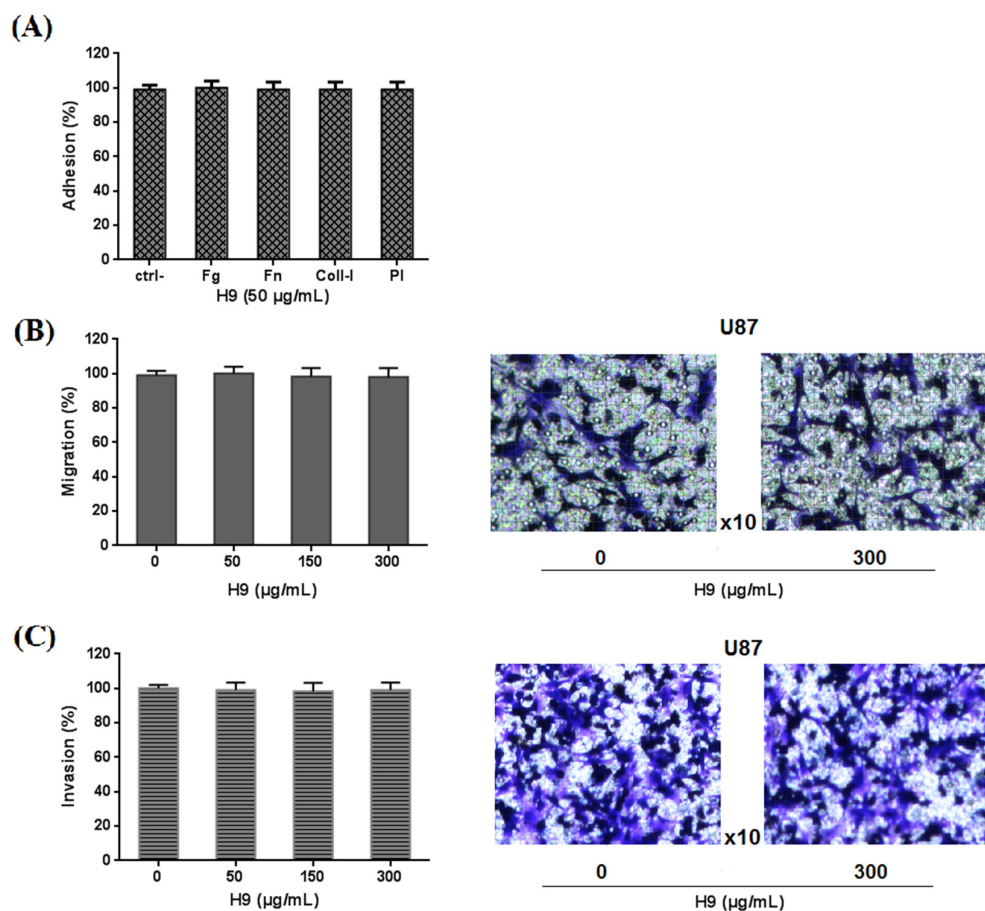

**Figure S2. Effect of H9 on U87 cell adhesion, migration, and invasion.**(A) **Adhesion assay:** Cells treated or not treated with H9 were deposited on wells coated with fibronectin (Fn) at 10 μg/mL, fibrinogen (Fg) at 5 μg/mL, collagen-I (Coll-I) at 50 μg/mL, as extracellular matrix (ECM), or poly-L-lysine (PI) at 20 μg/mL. Cells were allowed to adhere to the substrata for 2 h at 37 °C. (B) **Migration**

**assay:** Cells pretreated with H9 were added to pre-coated membranes with Fn (5 µg/mL), for 2 h at 37 °C, and allowed to migrate for 5 h at 37 °C in Boyden chambers. **(C) Invasion assay:** Matrigel™ was added on the membrane in Boyden chambers and allowed to solidify for 3 h at 37 °C. U87 cells pretreated with H9 were then added and incubated for 22 h at 37 °C. After incubation, attached cells were fixed, stained by 0.1% crystal violet (**Microscopic observation to the right**), then lysed with 1% SDS and quantified by measuring absorbance at 560 nm.

**Figure S3**

|               |                  |   |
|---------------|------------------|---|
| AaTs-1        | I <b>WKS</b> --- | 4 |
| Tetrapandin-2 | L <b>WK</b> T--- | 4 |
| FPRL-1 ligand | - <b>WK</b> YMVM | 6 |

**Figure S3. Sequence similarity search with AaTs-1.**(A) Multiple sequence alignment by BLAST. AaTs-1: Tetrascorpin from Aah; Tetrapandin-2 from *Pandinus imperator*; WKYMVm FPRL-1-ligand: a FPRL-1 synthetic peptide ligand.

Figure S4

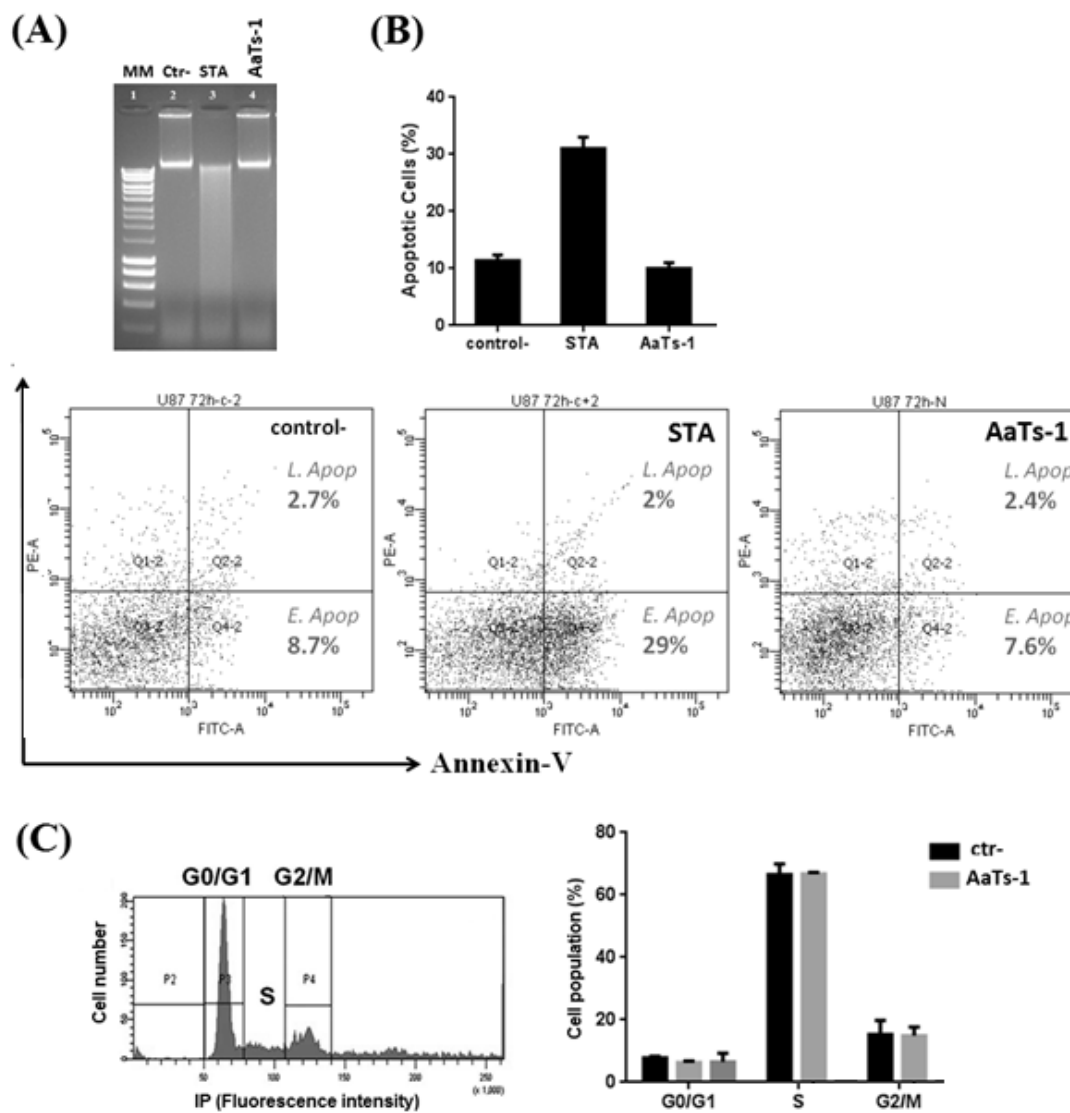

**Figure S4. Genomic DNA, apoptosis, and cell cycle analysis.** U87 cells were treated for 72 h with 0.56 mM of AaTs-1. For each FACS experiment, 10,000 events were analyzed. **(A)** Gel electrophoresis of genomic DNA of U87 cells treated with AaTs-1 (0.56 mM). MM: Molecular marker, STA: Staurosporin, E. Apop: Early apoptosis, L. Apop: Late apoptosis. **(B)** Quantitative analysis of apoptotic cells determined by FACS measurement. **(C)** Effect of AaTs-1 on the progression of the U87 cell cycle.
